# Supplementary figures and images for: Accuracy of pedigree and genomic predictions of carcass and novel meat quality traits in multi-breed sheep data assessed by cross-validation
Source: Springer Nature journal article supplement (doi:10.1186/1297-9686-44-33), 2012-11-12

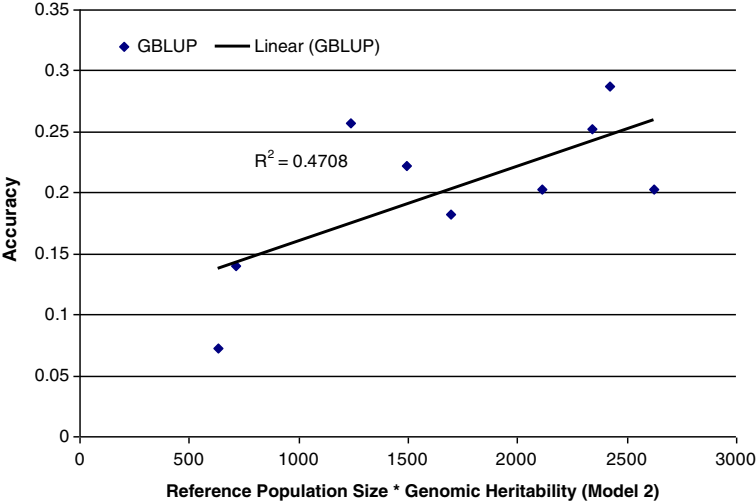

Supplement: 12711_2012_2541_MOESM5_ESM.pdf [file 12711_2012_2541_MOESM5_ESM.pdf]
